# Supplementary material
Source: PubMed Central journal article supplement (PMC10991427)
Supplement: 262_2020_2773_MOESM1_ESM.pdf [file 262_2020_2773_MOESM1_ESM.pdf]

**Supplementary table 1: Clinicopathological correlation between group I and group II uveal melanoma patients using Mann-Whitney Wilcoxon Test**

| Clinicopathological parameters (N=71) | N=71 (%) | UM with Tumour Infiltrating Lymphocytes (Group I) N=33 (%) | UM without Tumour Infiltrating Lymphocytes (Group II) N=38 (%) | *p-value | **p-value |
|---------------------------------------|----------|------------------------------------------------------------|----------------------------------------------------------------|----------|-----------|
| <b>Sex</b>                            |          |                                                            |                                                                |          |           |
| Male                                  | 46 (64%) | 24 (72%)                                                   | 22 (57%)                                                       | 0.19     | 0.304     |
| Female                                | 25 (35%) | 9 (27)                                                     | 16 (42%)                                                       |          |           |
| <b>Age</b>                            |          |                                                            |                                                                |          |           |
| ≤ 45 years                            | 18 (25%) | 7 (21%)                                                    | 11 (28%)                                                       | 0.45     | 0.554     |
| > 45 years                            | 53 (74%) | 26 (78%)                                                   | 27 (71%)                                                       |          |           |
| <b>AJCC clinical staging</b>          |          |                                                            |                                                                |          |           |
| T1-T2                                 | 44 (61%) | 19 (57%)                                                   | 25 (65%)                                                       | 0.48     | 0.549     |
| T3-T4                                 | 27 (38%) | 14 (42%)                                                   | 13 (34%)                                                       |          |           |
| <b>Scleral invasion</b>               |          |                                                            |                                                                |          |           |
| Absent                                | 52 (73%) | 21 (63%)                                                   | 31 (81%)                                                       | 0.09     | 0.160     |
| Present                               | 19 (26%) | 12 (36%)                                                   | 7 (18%)                                                        |          |           |
| <b>Ciliary body invasion</b>          |          |                                                            |                                                                |          |           |
| Absent                                | 54 (76%) | 22 (66%)                                                   | 32 (84%)                                                       | 0.08     | 0.160     |
| Present                               | 17 (23%) | 11 (33%)                                                   | 6 (15%)                                                        |          |           |
| <b>Extraocular extension</b>          |          |                                                            |                                                                |          |           |
| Absent                                | 62 (87%) | 28 (84%)                                                   | 34 (89%)                                                       | 0.56     | 0.597     |
| Present                               | 9 (12%)  | 5 (15%)                                                    | 4 (10%)                                                        |          |           |
| <b>Tumour pigmentation</b>            |          |                                                            |                                                                |          |           |
| Decrease                              | 20 (28%) | 10 (30%)                                                   | 10 (26%)                                                       | 0.71     | 0.710     |
| Increase                              | 51 (71%) | 23 (69%)                                                   | 28 (73%)                                                       |          |           |
| <b>Necrosis</b>                       |          |                                                            |                                                                |          |           |
| Absent                                | 46 (64%) | 23 (69%)                                                   | 23 (60%)                                                       | 0.42     | 0.560     |
| Present                               | 25 (35%) | 10 (30%)                                                   | 15 (39%)                                                       |          |           |
| <b>Liver Metastasis</b>               |          |                                                            |                                                                |          |           |
| Absent                                | 57 (80%) | 24 (72%)                                                   | 33 (86%)                                                       | 0.24     | 0.349     |
| Present                               | 14 (19%) | 9 (27%)                                                    | 5 (13%)                                                        |          |           |

\* p-value before Benjamini-Hochberg correction; \*\*p-value adjusted after Benjamini-Hochberg correction

**Supplementary Table 2: Correlation of PD 1 and PD L1 immunoeexpression with the clinicopathological parameters in group I and group II uveal melanoma patients**

| Clinicopathological parameters      | N=33 | Uveal melanoma with tumor infiltrating lymphocytes (TILs)<br>(Group I) |              |          |           |                         |              |          |           | N=38 | Uveal melanoma without tumor infiltrating lymphocytes (TILs)<br>(Group II) |             |          |           |                         |              |          |           |
|-------------------------------------|------|------------------------------------------------------------------------|--------------|----------|-----------|-------------------------|--------------|----------|-----------|------|----------------------------------------------------------------------------|-------------|----------|-----------|-------------------------|--------------|----------|-----------|
|                                     |      | PD-1 Immunoeexpression                                                 |              |          |           | PD-L1 Immunoeexpression |              |          |           |      | PD-1 Immunoeexpression                                                     |             |          |           | PD-L1 Immunoeexpression |              |          |           |
|                                     |      | Absent (10)                                                            | Present (23) | *p-value | **p-value | Absent (8)              | Present (25) | *p-value | **p-value |      | Absent (31)                                                                | Present (7) | *p-value | **p-value | Absent (19)             | Present (19) | *p-value | **p-value |
| <b>Sex</b>                          |      |                                                                        |              |          |           |                         |              |          |           |      |                                                                            |             |          |           |                         |              |          |           |
| Male                                | 24   | 8                                                                      | 16           | 0.53     | 0.652     | 7                       | 17           | 0.28     | 0.640     | 22   | 19                                                                         | 3           | 0.37     | 0.658     | 11                      | 11           | 1.00     | 1.000     |
| Female                              | 9    | 2                                                                      | 7            |          |           | 1                       | 8            |          |           | 16   | 12                                                                         | 4           |          |           | 8                       | 8            |          |           |
| <b>Age</b>                          |      |                                                                        |              |          |           |                         |              |          |           |      |                                                                            |             |          |           |                         |              |          |           |
| ≤ 45 years                          | 7    | 4                                                                      | 3            | 0.08     | 0.160     | 1                       | 6            | 0.48     | 0.698     | 11   | 9                                                                          | 2           | 0.98     | 0.980     | 3                       | 8            | 0.07     | 0.373     |
| > 45 years                          | 26   | 6                                                                      | 20           |          |           | 7                       | 19           |          |           | 27   | 22                                                                         | 5           |          |           | 16                      | 11           |          |           |
| <b>Largest tumor basal diameter</b> |      |                                                                        |              |          |           |                         |              |          |           |      |                                                                            |             |          |           |                         |              |          |           |
| ≤ 15mm                              | 6    | 2                                                                      | 4            | 0.85     | 0.850     | 2                       | 4            | 0.56     | 0.689     | 16   | 14                                                                         | 2           | 0.42     | 0.672     | 10                      | 6            | 0.18     | 0.576     |
| > 15mm                              | 27   | 8                                                                      | 19           |          |           | 6                       | 21           |          |           | 22   | 17                                                                         | 5           |          |           | 9                       | 13           |          |           |
| <b>Tumor thickness</b>              |      |                                                                        |              |          |           |                         |              |          |           |      |                                                                            |             |          |           |                         |              |          |           |
| ≤ 8mm                               | 12   | 2                                                                      | 10           | 0.19     | 0.304     | 5                       | 7            | 0.07     | 0.280     | 24   | 20                                                                         | 4           | 0.71     | 0.947     | 11                      | 13           | 0.50     | 0.889     |
| > 8mm                               | 21   | 8                                                                      | 13           |          |           | 3                       | 18           |          |           | 14   | 11                                                                         | 3           |          |           | 8                       | 6            |          |           |
| <b>Scleral invasion</b>             |      |                                                                        |              |          |           |                         |              |          |           |      |                                                                            |             |          |           |                         |              |          |           |
| Absent                              | 21   | 6                                                                      | 15           | 0.77     | 0.880     | 7                       | 14           | 0.10     | 0.320     | 31   | 27                                                                         | 4           | 0.06     | 0.192     | 16                      | 15           | 0.67     | 1.072     |
| Present                             | 12   | 4                                                                      | 8            |          |           | 1                       | 11           |          |           | 7    | 4                                                                          | 3           |          |           | 3                       | 4            |          |           |
| <b>Extraocular extension</b>        |      |                                                                        |              |          |           |                         |              |          |           |      |                                                                            |             |          |           |                         |              |          |           |
| Absent                              | 28   | 7                                                                      | 21           | 0.11     | 0.196     | 7                       | 21           | 0.81     | 0.810     | 34   | 29                                                                         | 5           | 0.08     | 0.213     | 18                      | 16           | 0.29     | 0.773     |
| Present                             | 5    | 3                                                                      | 2            |          |           | 1                       | 4            |          |           | 4    | 2                                                                          | 2           |          |           | 1                       | 3            |          |           |
| <b>Mitotic count</b>                |      |                                                                        |              |          |           |                         |              |          |           |      |                                                                            |             |          |           |                         |              |          |           |
| <4/40HPF                            | 12   | 5                                                                      | 7            | 0.28     | 0.407     | 4                       | 8            | 0.35     | 0.700     | 31   | 26                                                                         | 5           | 0.44     | 0.640     | 16                      | 15           | 0.67     | 0.975     |
| ≥4/40HPF                            | 21   | 5                                                                      | 16           |          |           | 4                       | 13           |          |           | 7    | 5                                                                          | 2           |          |           | 3                       | 4            |          |           |
| <b>Microvascular density</b>        |      |                                                                        |              |          |           |                         |              |          |           |      |                                                                            |             |          |           |                         |              |          |           |
| ≤50 vessels/0.25mm <sup>2</sup>     | 12   | 4                                                                      | 8            | 0.77     | 0.821     | 4                       | 8            | 0.35     | 0.622     | 26   | 23                                                                         | 3           | 0.10     | 0.229     | 14                      | 12           | 0.48     | 1.097     |
| >50 vessels/0.25mm <sup>2</sup>     | 21   | 6                                                                      | 15           |          |           | 4                       | 17           |          |           | 12   | 8                                                                          | 4           |          |           | 5                       | 7            |          |           |
| <b>Necrosis</b>                     |      |                                                                        |              |          |           |                         |              |          |           |      |                                                                            |             |          |           |                         |              |          |           |
| Absent                              | 23   | 6                                                                      | 17           | 0.4      | 0.533     | 5                       | 18           | 0.61     | 0.697     | 23   | 19                                                                         | 4           | 0.83     | 0.949     | 12                      | 11           | 0.74     | 0.846     |
| Present                             | 10   | 4                                                                      | 6            |          |           | 3                       | 7            |          |           | 15   | 12                                                                         | 3           |          |           | 7                       | 8            |          |           |

\* p-value before Benjamini-Hochberg correction; \*\*p-value adjusted after Benjamini-Hochberg correction

**Supplementary Table 3: Correlation of PD-1 and PD-L1 mRNA expression with the clinicopathological parameters in uveal melanoma patients**

| Clinicopathological parameters (N=71)      | N=71 | PD-1 mRNA Expression |                | *p-value | **p-value | PD-L1 mRNA Expression |                | *p-value | **p-value |
|--------------------------------------------|------|----------------------|----------------|----------|-----------|-----------------------|----------------|----------|-----------|
|                                            |      | Absent (n=45)        | Present (n=26) |          |           | Absent (n=32)         | Present (n=39) |          |           |
| <b><u>Sex</u></b>                          |      |                      |                |          |           |                       |                |          |           |
| Male                                       | 46   | 28                   | 18             | 0.55     | 0.779     | 20                    | 26             | 0.80     | 0.907     |
| Female                                     | 25   | 17                   | 8              |          |           | 12                    | 13             |          |           |
| <b><u>Age</u></b>                          |      |                      |                |          |           |                       |                |          |           |
| ≤ 45 years                                 | 18   | 11                   | 7              | 0.81     | 0.861     | 8                     | 10             | 1.00     | 1.063     |
| > 45 years                                 | 53   | 34                   | 19             |          |           | 24                    | 29             |          |           |
| <b><u>Largest tumor basal diameter</u></b> |      |                      |                |          |           |                       |                |          |           |
| ≤ 15mm                                     | 22   | 17                   | 5              | 0.10     | 0.213     | 12                    | 10             | 0.31     | 0.586     |
| > 15mm                                     | 49   | 28                   | 21             |          |           | 20                    | 29             |          |           |
| <b><u>Tumour thickness</u></b>             |      |                      |                |          |           |                       |                |          |           |
| ≤ 8mm (36)                                 | 36   | 27                   | 9              | 0.039    | 0.095     | 21                    | 15             | 0.032    | 0.136     |
| > 8mm (35)                                 | 35   | 18                   | 17             |          |           | 11                    | 24             |          |           |
| <b><u>AJCC clinical staging</u></b>        |      |                      |                |          |           |                       |                |          |           |
| T1-T2                                      | 44   | 29                   | 15             | 0.57     | 0.692     | 24                    | 20             | 0.05     | 0.170     |
| T3-T4                                      | 27   | 16                   | 11             |          |           | 8                     | 19             |          |           |
| <b><u>Scleral invasion</u></b>             |      |                      |                |          |           |                       |                |          |           |
| Absent                                     | 52   | 34                   | 18             | 0.56     | 0.732     | 24                    | 28             | 0.79     | 0.959     |
| Present                                    | 19   | 11                   | 8              |          |           | 8                     | 11             |          |           |
| <b><u>Ciliary body invasion</u></b>        |      |                      |                |          |           |                       |                |          |           |
| Absent                                     | 54   | 37                   | 17             | 0.10     | 0.189     | 26                    | 28             | 0.41     | 0.697     |
| Present                                    | 17   | 8                    | 9              |          |           | 6                     | 11             |          |           |
| <b><u>Extraocular extension</u></b>        |      |                      |                |          |           |                       |                |          |           |
| Absent                                     | 62   | 41                   | 21             | 0.27     | 0.417     | 29                    | 33             | 0.49     | 0.694     |
| Present                                    | 9    | 4                    | 5              |          |           | 3                     | 6              |          |           |
| <b><u>Tumour pigmentation</u></b>          |      |                      |                |          |           |                       |                |          |           |
| Decrease                                   | 20   | 13                   | 7              | 1.00     | 1.000     | 12                    | 8              | 0.18     | 0.383     |
| Increase                                   | 51   | 32                   | 19             |          |           | 20                    | 31             |          |           |
| <b><u>Epithelioid cell type</u></b>        |      |                      |                |          |           |                       |                |          |           |
| Absent                                     | 31   | 27                   | 4              | <0.001   | 0.017     | 15                    | 16             | 0.63     | 0.824     |
| Present                                    | 40   | 18                   | 22             |          |           | 17                    | 23             |          |           |
| <b><u>Mitotic count</u></b>                |      |                      |                |          |           |                       |                |          |           |
| <4/40HPF                                   | 43   | 35                   | 8              | <0.001   | 0.009     | 24                    | 19             | 0.029    | 0.164     |
| ≥4/40HPF                                   | 28   | 10                   | 18             |          |           | 8                     | 20             |          |           |

|                                        |           |           |           |        |              |           |           |              |              |
|----------------------------------------|-----------|-----------|-----------|--------|--------------|-----------|-----------|--------------|--------------|
| <b><u>Infiltrating macrophages</u></b> |           |           |           |        |              |           |           |              |              |
| ≤50% CD68 positivity                   | 40        | 35        | 5         | <0.001 | <b>0.006</b> | 24        | 16        | <b>0.007</b> | <b>0.119</b> |
| >50% CD68 positivity                   | 31        | 10        | 21        |        |              | 8         | 23        |              |              |
| <b><u>Microvascular density</u></b>    |           |           |           |        |              |           |           |              |              |
| ≤50 vessels/0.25mm <sup>2</sup>        | 38        | 32        | 6         | <0.001 | <b>0.004</b> | 21        | 17        | 0.09         | <b>0.219</b> |
| >50 vessels/0.25mm <sup>2</sup>        | 33        | 13        | 20        |        |              | 11        | 22        |              |              |
| <b><u>Necrosis</u></b>                 |           |           |           |        |              |           |           |              |              |
| Absent                                 | 46        | 28        | 18        | 0.61   | <b>0.691</b> | 21        | 25        | 1.00         | <b>1.000</b> |
| Present                                | 25        | 17        | 8         |        |              | 11        | 14        |              |              |
| <b><u>BAP1 staining</u></b>            |           |           |           |        |              |           |           |              |              |
| Present                                | 29        | 26        | 3         | <0.001 | <b>0.003</b> | 15        | 14        | 0.46         | <b>0.711</b> |
| Absent                                 | 42        | 19        | 23        |        |              | 17        | 25        |              |              |
| <b><u>Liver Metastasis</u></b>         |           |           |           |        |              |           |           |              |              |
| Absent                                 | 57        | 39        | 18        | 0.11   | <b>0.187</b> | 29        | 28        | 0.07         | <b>0.198</b> |
| Present                                | 14        | 6         | 8         |        |              | 3         | 11        |              |              |
| <b><u>TILs</u></b>                     |           |           |           |        |              |           |           |              |              |
| Absent                                 | <b>38</b> | <b>34</b> | <b>4</b>  | <0.001 | <b>0.003</b> | <b>23</b> | <b>15</b> | <b>0.008</b> | <b>0.068</b> |
| Present                                | <b>33</b> | <b>11</b> | <b>22</b> |        |              | <b>9</b>  | <b>24</b> |              |              |

\* p-value before Benjamini-Hochberg correction; \*\*p-value adjusted after Benjamini-Hochberg correction

Bold signifies statistically significant value

**Supplementary Table 4: Expression of Immune checkpoint markers with the patient outcome using Kaplan-Meier Analysis and Log-rank test**

| No. of cases                     | Immunoexpression                            |            |                                       |                  |              | mRNA expression                             |            |                                      |              |              |
|----------------------------------|---------------------------------------------|------------|---------------------------------------|------------------|--------------|---------------------------------------------|------------|--------------------------------------|--------------|--------------|
|                                  | Immune checkpoint markers                   | DFS        | HR (95%CI)                            | *p-value         | **p-value    | Immune checkpoint markers                   | DFS        | HR (95%CI)                           | *p-value     | **p-value    |
| UM Cases (n=71)                  | <b>PD-1</b><br>Absent (41)<br>Present (30)  | 85%<br>70% | 0.41 (0.14-1.17)<br>2.40 (0.84-6.79)  | 0.08             | <b>0.12</b>  | <b>PD-1</b><br>Absent (45)<br>Present (26)  | 86%<br>65% | 0.30 (0.10-0.89)<br>3.32 (1.11-9.92) | <b>0.013</b> | <b>0.039</b> |
|                                  | <b>PD-L1</b><br>Absent (27)<br>Present (44) | 96%<br>68% | 0.10 (0.03-0.30)<br>9.30 (3.30-26.14) | <b>0.007</b>     | <b>0.021</b> | <b>PD-L1</b><br>Absent (32)<br>Present (39) | 87%<br>71% | 0.48 (0.17-1.36)<br>2.04 (0.10-5.68) | 0.20         | <b>0.4</b>   |
| UM with TILs; Group I (n=33)     | <b>PD-1</b><br>Absent (10)<br>Present (23)  | 69%<br>60% | 0.5(0.13-2.15)<br>1.8(0.46-7.58)      | 0.29             | <b>0.348</b> | <b>PD-1</b><br>Absent (11)<br>Present (22)  | 68%<br>63% | 0.6(0.16-2.41)<br>1.5(0.41-6.01)     | 0.45         | <b>0.54</b>  |
|                                  | <b>PD-L1</b><br>Absent (8)<br>Present (25)  | 87%<br>60% | 0.4(0.09-1.77)<br>2.4(0.56-10.88)     | 0.36             | <b>0.36</b>  | <b>PD-L1</b><br>Absent (9)<br>Present (24)  | 66%<br>66% | 1.6(0.36-7.74)<br>0.5(0.12-2.75)     | 0.43         | <b>0.645</b> |
| UM without TILs; Group II (n=38) | <b>PD-1</b><br>Absent (31)<br>Present (7)   | 93%<br>42% | 0.1(0.00-0.79)<br>14.9(1.25-179.1)    | <b>&lt;0.001</b> | <b>0.006</b> | <b>PD-1</b><br>Absent (34)<br>Present (4)   | 88%<br>50% | 0.1(0.00-3.64)<br>7.5(0.27-207)      | <b>0.004</b> | <b>0.024</b> |
|                                  | <b>PD-L1</b><br>Absent (19)<br>Present (19) | 73%<br>94% | 6.65(1.32-33.49)<br>0.15(0.02-0.75)   | <b>0.036</b>     | <b>0.072</b> | <b>PD-L1</b><br>Absent (23)<br>Present (15) | 73%<br>91% | 1.1(0.22-6.25)<br>0.8(0.15-4.35)     | 0.81         | <b>0.81</b>  |

\* p-value before Benjamini-Hochberg correction; \*\*p-value adjusted after Benjamini-Hochberg correction
